# Supplementary material
Source: Springer Nature journal article supplement (https://www.springermedizin.de/resource/supplementary/12882_2002_10_MOESM3_ESM.pdf/9454772)
Supplement: MOESM3 [file 9454772]

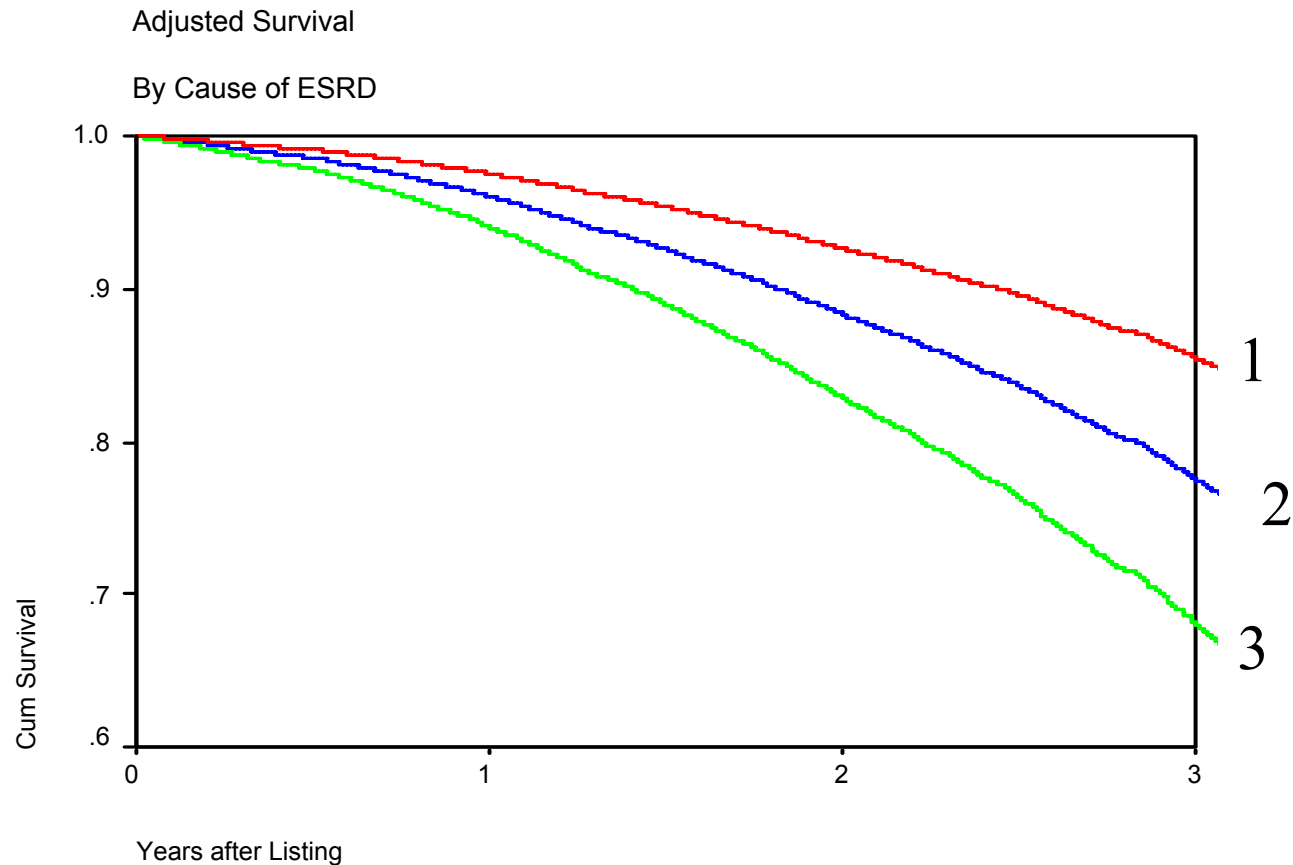

Figure 4

Adjusted survival (at the mean of covariates specified in the methods section), by cause of ESRD. U.S. Patients on the renal transplant waiting list, who started dialysis from 1 April 1995-29 June 1999, N=40,493. 1=Patients with Polycystic kidney disease, 2= patients without Polycystic kidney disease or diabetes, 3=patients with diabetes. All diseases listed are as causes of end stage renal disease.
